## A Role for Nup153 in Nuclear Assembly Reveals Differential Requirements for Targeting of Nuclear Envelope Constituents

Dollie LaJoie<sup>1^</sup>, Ayse M. Turkmen<sup>1</sup>, Douglas R. Mackay<sup>1</sup>, Christopher C. Jensen<sup>1</sup>, Vasilisa Aksenova<sup>2</sup>, Maho Niwa<sup>3</sup>, Mary Dasso<sup>2</sup>, Katharine S. Ullman<sup>1\*</sup>

**Running title:** Nup153 and nuclear envelope assembly

**Affiliations:** <sup>1</sup>Department of Oncological Sciences, Huntsman Cancer Institute, University of Utah, Salt Lake City, UT, 84112, <sup>2</sup>Division of Molecular and Cellular Biology, National Institute of Child Health and Human Development, National Institutes of Health, Bethesda, MD, 20892, <sup>3</sup>Division of Biological Sciences, Section of Molecular Biology, University of California, San Diego, NSB#1, Rm. 5328, 9500 Gilman Drive, La Jolla, CA 92093

\*corresponding author, [katharine.ullman@hci.utah.edu](mailto:katharine.ullman@hci.utah.edu)

<sup>^</sup>present address: Max Planck Institute for Molecular, Cell Biology and Genetics, Pfotenhauerstrasse 108, Dresden, Germany 01307

**Abbreviations:** AID, auxin inducible degradation; DAPI, 4',6-diamidino-2-phenylindole; ER, endoplasmic reticulum; ESCRT, endosomal sorting complexes required for transport; INM, inner nuclear membrane; LBR, lamin B receptor; NE, nuclear envelope; NPC, nuclear pore complex; SUN1/2, Sad1 and UNC84 Domain Containing

## Abstract:

2 Assembly of the nucleus following mitosis requires rapid and coordinate recruitment of  
diverse constituents to the inner nuclear membrane. We have identified an unexpected  
4 role for the nucleoporin Nup153 in promoting the continued addition of a subset of  
nuclear envelope proteins during initial expansion of nascent nuclei. Specifically,  
6 disrupting the function of Nup153 interferes with ongoing addition of B-type lamins,  
lamin B receptor (LBR), and SUN1 early in telophase, after the nuclear envelope (NE)  
8 has initially enclosed chromatin. In contrast, effects on lamin A and SUN2 were minimal,  
pointing to differential requirements for the ongoing targeting of nuclear envelope  
10 proteins. Further, distinct mis-targeting phenotypes arose among the proteins that  
require Nup153 for NE targeting. Thus, disrupting the function of Nup153 in nuclear  
12 formation reveals several previously undescribed features important for establishing  
nuclear architecture: 1) a role for a nuclear basket constituent in ongoing recruitment of  
14 nuclear envelope components, 2) two functionally separable phases of nuclear  
envelope formation in mammalian cells, and 3) distinct requirements of individual  
16 nuclear envelope residents for continued targeting during the expansion phase of NE  
reformation.

18

## Introduction:

20 Metazoan cells undergo an open mitosis in which the nuclear membranes, nuclear  
22 lamina, and nuclear pore complexes (NPCs) disperse prior to partitioning of the  
genome. Soon after chromosomes begin to segregate, the process of nuclear assembly  
24 begins to take place around each mass of chromosomes, termed a chromatin disk. The  
mitotic endoplasmic reticulum (ER), which accommodates membrane proteins that are  
26 residents of the nuclear envelope (NE), begins to contact and enclose the  
chromosomes at early anaphase (LaJoie and Ullman, 2017; Schellhaus et al., 2016). At  
28 this time, the inner and outer membranes of the NE are established and a diverse  
repertoire of NE constituents target to the chromatin surface, with some taking on roles  
30 critical to coordinating nuclear assembly. One such role is recruitment of machinery to  
synchronously remodel microtubules and seal membranes, which takes place at  
32 subdomains within the nuclear envelope termed 'core' regions. Core regions form  
transiently in the center of anaphase disks, on both inner and outer faces, with the  
34 remainder of the NE termed the 'non-core' region (Liu and Pellman, 2020). Members of  
the endosomal sorting complexes required for transport (ESCRT) pathway are recruited  
36 to this site and play a central role in sealing the NE in a coordinate fashion (Stoten and  
Carlton, 2018). Concomitantly, rapid nuclear pore formation takes place at the non-core  
38 region (Otsuka and Ellenberg, 2018). Thus, once the NE is sealed, the nucleus is  
competent to establish specialization of the nuclear environment via nucleocytoplasmic  
40 transport. To fully form normal nuclear architecture, however, the NE must also continue  
to expand. Indeed, coordinated lipid synthesis in conjunction with ESCRT-mediated  
42 sealing was found to be important in nuclear assembly (Penfield et al., 2020). At the  
transition from closure to expansion, NE proteins redistribute throughout the INM,  
44 removing the distinction between core and non-core regions (Maeshima et al., 2006).  
NPCs continue to be added, but their biogenesis at this stage, which is termed an  
46 'interphasic' or 'inside-out' route, has distinct features due to the necessity to form this

48 macromolecular structure in what is now a contiguous double lipid bilayer (Otsuka and  
49 Ellenberg, 2018).

50 Beyond this second, distinct route of NPC formation, for which an understanding has  
51 begun to emerge (Doucet and Hetzer, 2010; Dultz and Ellenberg, 2010; Otsuka et al.,  
52 2016; Otsuka et al., 2021), little is known about the second phase of nuclear assembly,  
53 NE expansion. Early work in the *Xenopus* egg extract system identified roles for the  
54 AAA-ATPase p97, mediated by specific co-factors that were key in defining distinct  
55 phases of NE sealing versus continued nuclear growth (Hetzer et al., 2001). This has  
56 since been appreciated to reflect a role for p97 in removing Aurora B associated with  
57 chromatin (Dobrynin et al., 2011), as well as in establishing a reticular ER network that  
58 efficiently encloses chromatin (Hetzer et al., 2001). ER shaping proteins actively  
59 regulate ER morphology during nuclear assembly to promote proper reformation of the  
60 nuclear envelope at a time when INM proteins are being targeted to and enriching at the  
61 chromatin surface (Anderson and Hetzer, 2008; Lu et al., 2009, 2011). It is of note that  
62 the architecture of the endoplasmic reticulum, and particularly the role of Atlastin, is  
63 established to be important for INM protein diffusion through the ER and subsequent  
64 targeting to the NE at interphase (Pawar et al., 2017). There has also been  
65 considerable focus on how proteins target to the INM during ongoing recruitment of  
66 newly-synthesized INM proteins at interphase (Boni et al., 2015; King et al., 2006;  
67 Lokareddy et al., 2015; Meinema et al., 2011; Ohba et al., 2004; Rempel et al., 2020;  
68 Ungricht et al., 2016). These studies point toward pathways for INM protein passage  
69 through the NPC, after which interactions at the nuclear periphery may aid in retention.  
70 Nuclear size control has additionally been scrutinized, reinforcing the importance of  
71 perinuclear ER and revealing several transport related factors that dictate the extent  
72 and maintenance of nuclear dimensions (Jevtic et al., 2019; Mukherjee et al., 2020;  
73 Vukovic et al., 2016). Although post-mitotic NE expansion may rely on some of the  
74 same mechanisms studied in these other contexts, the results we present here reveal  
75 requirements in mammalian cells unique to NE growth during initial nuclear formation.  
76 Moreover, our results also expose distinctions among INM proteins in terms of their  
77 requirements for NE targeting at this stage.

78 Failure to form a normal nuclear envelope environment results in impaired  
79 compartmentalization and DNA damage (Vietri et al., 2015; von Appen et al., 2020).  
80 This is exemplified by micronuclei, which are hallmarks of tumor cells and form from  
81 chromosomes aberrantly separated from the primary nucleus due to missegregation  
82 events. Nuclear envelope formed at these sites often fails to recruit the full repertoire of  
83 INM proteins and is similar to the core domain at the newly-forming primary nucleus:  
84 enriched in LEM-domain proteins and deficient in B-type lamins and NPCs (Liu et al.,  
85 2018). Such micronuclei suffer from unrestrained membrane remodeling events by the  
86 ESCRT-III pathway (Vietri et al., 2020; Willan et al., 2019) and are prone to rupture  
87 (Hatch et al., 2013). Ultimately micronuclei experience increased DNA damage,  
88 conferring genome instability to an already vulnerable chromosome or chromosomal  
89 fragment (Hatch et al., 2013; Liu et al., 2018; Zhang et al., 2015).

92 This report focuses on Nup153, a constituent of the nuclear pore that is part of a basket-  
94 like structure emanating from the nuclear face of the NPC (Ball and Ullman, 2005). We  
96 have found that Nup153 plays a novel role in promoting nuclear assembly that is  
98 required for targeting B-type lamins and a subset of inner nuclear membrane proteins  
during telophase. The timing of this role uncouples early targeting events from the  
continued addition of certain nuclear envelope constituents. These data reveal  
unexpected and distinct NE protein targeting requirements and highlight the existence  
of a specific phase of nuclear formation.

100

## 102 **Results:**

### 104 **Nup153 plays a role in lamin B localization after mitosis**

106 We previously reported that Nup153 depletion results in ectopic localization of lamin  
108 proteins in newly divided cells. Cells with this phenotype remain attached by an  
intercellular bridge containing an elongated microtubule midbody structure but otherwise  
appear to have interphase nuclear morphology, indicating they are in late telophase and  
have recently undergone nuclear assembly (Mackay et al., 2010). To further assess the  
110 role of Nup153 in nuclear lamina formation, we employed a panel of antibodies that  
discriminate between lamins A/C, B1, or B2 (Supplemental Figure 1). Using these  
112 isoform-specific antibodies, we found lamin A/C to be weakly mistargeted when Nup153  
is depleted, whereas lamins B1 and B2 had a robust ectopic localization phenotype in  
114 late telophase cells (Figure 1A). In fixed cell analysis, endogenous lamin B2  
mistargeting in Nup153-depleted cells was detectable in some early telophase cells  
116 (identified by a compact midbody structure connecting cells that have not fully  
flattened), with a robust phenotype present in  $80\pm 13\%$  of cells at late telophase (Figure  
118 1B). These observations suggested a role for Nup153 in the continued addition of B-  
type lamins after early targeting events in nuclear formation have completed.  
120 Alternatively, this phenotype could arise from an autophagic process of lamin B removal  
similar to what has been observed during senescence (Dou et al., 2015). To address  
122 these possibilities, we monitored the development of the phenotype in real-time. Live  
imaging of cells confirmed that early steps of nuclear assembly proceed normally in  
124 cells depleted of Nup153. Specifically, a canonical 'core' domain at anaphase marked  
by LEM2-mCherry formed while GFP-lamin B2 was recruited to non-core regions and  
126 subsequently encircled the chromatin disk similarly in both siControl and siNup153-  
treated cells (Supplemental Figure 2). In cells co-expressing H2B-mCherry and GFP-  
128 lamin B2, normal lamin B2 targeting to the chromatin surface during anaphase was  
evidenced by GFP-lamin B2 coating the nuclear surface at the time of complete  
130 cleavage furrow ingression (defined here as  $t=0$ ). However, at the transition from  
anaphase to telophase, lamin B2 initiated accumulation at focal sites in the cytoplasm in  
132 cells depleted of Nup153 (Supplemental Figure 2, Figure 1C). The appearance of  
ectopic lamin B2 at sites distant from the nucleus supports the conclusion that lamin B  
134 is not being removed from the nuclear surface, but rather is not targeting normally to the  
nuclear surface once the chromatin is enclosed by membrane.

136

138 Treatment with an independent siRNA directed against Nup153 similarly resulted in  
ectopic targeting of lamin B2 (si153-1, Supplemental Figure 3A), with reduction of  
140 Nup153 protein levels following siRNA treatment corroborated by immunofluorescence  
and immunoblot for both oligos (Supplemental Figure 3A-B). Moreover, non-  
142 transformed retinal pigment epithelial (RPE-1) cells also exhibit ectopic lamin B2  
mistargeting in late telophase cells when Nup153 levels are depleted (Supplemental  
144 Figure 3C). Further substantiating our findings, induced expression of the C-terminal  
domain of Nup153 (Nup153-C), which we previously found to behave in a dominant  
146 negative fashion (Mackay et al., 2010), also resulted in lamin B2 mistargeting in Hela  
cells (Supplementary Figure 3D).

148 As Nup153 is known to be critical for localization of the nuclear pore basket proteins Tpr  
and Nup50 in late telophase cells (Aksenova et al., 2020; Hase and Cordes, 2003;  
150 Mackay et al., 2010), we sought to distinguish whether the lamin phenotype observed  
was due to displacement of these basket constituents or to disruption of a distinct role of  
152 Nup153. We found that neither depletion of Tpr nor depletion of Nup50 (Figure 2A)  
altered lamin B2 targeting (Figure 2B-C), indicating that the observed role for Nup153  
154 function in lamin targeting is unique and not due to the absence of other constituents of  
the nuclear pore basket.

156

### 158 **Disrupting Nup153 functions reveals different targeting requirements for nuclear envelope proteins**

160 We previously reported that depleting Nup153 results in an Aurora B-dependent delay  
in abscission. Although this prolongs the duration of cytokinesis, only ~15% of cells are  
162 at the post-mitotic stage where this nuclear assembly phenotype manifests in Nup153-  
depleted cell cultures (Mackay et al., 2010). Thus, to further elucidate the role of  
164 Nup153 in nuclear formation, we sought a system more amenable to studying events at  
this cell cycle juncture quantitatively. To this end, we treated cells with thymidine to  
166 block cell division in G1/S followed by wash-out to release. Using this method, we found  
that, as expected, the number of late telophase cells, tracked by the appearance of  
168 phospho-Aurora B at an intercellular bridge of tubulin (yellow arrows), was similar in  
siControl- and siNup153-treated cells 10 hours post-release (white arrows indicate early  
170 telophase cells, Supplemental Figure 4). By 16 hours post-release, however, siControl-  
treated cells had progressed through cytokinesis while  $46 \pm 4\%$  of Nup153-depleted cells  
172 had accumulated in late telophase, where cell cycle progression is paused due to the  
abscission checkpoint. Under these conditions,  $81 \pm 10\%$  of late telophase cells depleted  
174 of Nup153 exhibited ectopic lamin B2 targeting, a proportion consistent with  
asynchronous experiments ( $80 \pm 13\%$ ; Supplemental Figure 4D and Figure 1D).

176 Therefore, this strategy enriches for late telophase cells with an unaltered incidence of  
lamin B2 mis-targeting following Nup153 reduction, providing an ideal system in which  
178 to quantify additional aspects of this phenotype.

180 The selectivity of the lamin-targeting phenotype to B-type lamins, which – unlike lamin A  
– stably associate with membrane via a farnesyl moiety, prompted us to probe whether  
182 other proteins associated with NE membrane also mistarget when Nup153 levels are

184 reduced. Two hallmark transmembrane proteins of the NE are SUN1 and SUN2, which  
186 each make contact with the nuclear lamina juxtaposed on the INM while interacting with  
188 outer nuclear membrane KASH-domain containing proteins in the NE lumen (Crisp et  
190 al., 2006). Similar to lamin B2, SUN1 robustly mistargeted in late telophase cells when  
192 Nup153 function was disrupted either by siRNA depletion or following expression of the  
194 dominant negative C-terminal fragment of Nup153 (Figure 3A, Supplemental Figure  
196 5A). Given this result, it was surprising to find that SUN2 did not display notable  
198 mistargeting in Nup153-depleted cells at late telophase (Figure 3B). SUN1 mistargeting  
to ectopic sites occurred in a similar proportion of late telophase cells as observed for  
lamin B2, with SUN1 enriched 2-fold at ectopic sites relative to the NE (Figure 3C-D).  
Assessing SUN2 at the sites of ectopic SUN1 enrichment revealed SUN2 was not  
excluded from these sites, however it was present below levels found at the nucleus  
(Figure 3D). Plot line profile analysis of spinning disk confocal images further  
corroborated the conclusion that SUN1 but not SUN2 was significantly mistargeted  
when Nup153 levels are reduced (Figure 3E-F).

### 198 **Nuclear envelope proteins co-localize at ectopic NE-like membrane domains** 200 **distinct from micronuclei**

202 To gain further insight into the phenotype of aberrant targeting of particular NE residents  
204 when Nup153 function is compromised, we further characterized the focal cytoplasmic  
206 accumulation of mis-targeted proteins. We first asked the question of whether lamin B1  
208 and B2 co-localize and found that antibodies against these B-type lamins co-stained  
ectopic foci when Nup153 is depleted (Figure 4A). Consistent with our finding that the  
incidence of ectopic lamin B2 and SUN1 accumulation was similar in late telophase  
cells following Nup153 depletion (Figure 3C, Supplemental Figure 4D), we found that  
these proteins also co-enriched at ectopic sites when assessed by spinning disk  
confocal microscopy (Figure 4B). Plot line profile analysis confirmed that both SUN1  
and lamin B2 concentrated at these ectopic sites relative to their levels at the nucleus.  
In assessing additional INM residents, we found that Lap2 $\beta$  co-localized robustly at  
these cytoplasmic sites, but in contrast to SUN1, retained normal levels of targeting to  
the nuclear rim (Figure 4D,E).

214 Despite the accumulation of membrane-associated NE proteins, DNA was not detected  
216 at these ectopic sites, as illustrated by plot line profile analysis of spinning disk confocal  
218 micrographs (Figure 3F; Figure 4C,E). This indicates that the aberrant accumulation of  
NE constituents following Nup153-depletion is not due to missegregation and  
subsequent micronuclear formation. Further reinforcing this conclusion, the nuclear  
protein Lap2 $\alpha$  was found to enrich at micronuclei as expected (Liu et al., 2018), while  
present only at low levels at ectopic NE-like domains resulting from Nup153 depletion  
(Figure 4F). Indeed, while micronuclei often lack constituents such as B-type lamins and  
are enriched in lamin A and LEM-domain proteins (de Castro et al., 2018; Liu et al.,  
2018), the NE-like foci that form upon Nup153-depletion are instead enriched with  
proteins that are frequently low or absent at micronuclei (Figure 4D). Probing SUN1 and  
SUN2 at micronuclei, we found that SUN2, but not SUN1, enriched at micronuclei  
marked by high levels of LEM2 (Supplemental Figure 6). This pattern again contrasts

228 with that seen following Nup153 depletion, which altered SUN1, not SUN2, targeting to  
the NE.

230  
232 Although the sites of NE protein accumulation that result from interference with Nup153  
234 function are not micronuclei, the presence of integral membrane proteins suggested that  
236 these focal domains are membranous. As NE proteins intermix with the endoplasmic  
238 reticulum at mitosis (Ellenberg et al., 1997; Yang et al., 1997), we expressed BFP-  
240 Sec61 $\beta$  and tracked its appearance in live cells. This canonical ER marker was found at  
242 sites of ectopic lamin B2 accumulation seen after Nup153 depletion, demonstrating  
continuity with the endoplasmic reticulum membrane, similar to its continuity with the NE  
proper (Figure 4G). This is also consistent with the appearance of lamin B2 in live-  
imaging (Figure 1C, Supplemental Figure 2), where this marker was seen in a reticular  
pattern in both control and Nup153-depleted cells, consistent with the morphology of the  
mitotic ER, and then accumulated at ER-associated sites in Nup153-depleted cells.

### 244 **A core/non-core framework reveals further complexity in targeting requirements of NE proteins**

246 Although not originally anticipated, the pattern of Nup153-dependency in ongoing  
248 targeting of NE proteins appeared to reveal a requirement for Nup153 particular to non-  
core NE proteins (SUN1 and lamin B vs. SUN2, lamin A, LEM2). Targeting of LAP2 $\beta$ , a  
250 protein that has been detected at the non-core region (Dechat et al., 2004), was also  
dependent on Nup153, although its distribution was not altered to the same extent.  
252 Since NPC assembly occurs concomitantly with the early events of nuclear assembly in  
the non-core region, we probed the localization of POM121, an integral membrane  
254 protein of the nuclear pore, in late telophase cells. Following interference with Nup153  
activity either via siRNA depletion or expression of a dominant negative fragment, late  
telophase cells with ectopic targeting of lamin B2 show no ectopic targeting of POM121  
(Supplemental Figure 5B-D). As POM121 is first recruited to the non-core region, at  
256 face value this unperturbed localization does not fit the framework of a connection  
between Nup153 and non-core protein targeting. Yet, it is consistent with assembly of  
258 NPCs via a Nup153-independent 'post-mitotic' route at this site (Vollmer et al., 2015).  
Recruitment of NPC components may operate independently of requirements that  
260 distinguish core/non-core proteins even though pore formation is spatially restricted to  
the non-core region initially.

262  
264 To further probe the core/non-core context of Nup153-dependency, we tracked another  
non-core NE protein, Lamin B Receptor (LBR). In this case, there was a clear  
266 dependency on Nup153 for LBR NE targeting: LBR accumulated at the NE less  
efficiently when Nup153 was impaired and instead a significant population was detected  
268 throughout the endoplasmic reticulum in late telophase cells (Figure 5A-B). Curiously,  
LBR did not greatly enrich at ectopic sites that include SUN1, although it is not excluded  
when assessed by plot line profile analysis following confocal microscopy (Figure 5C-  
270 D). This phenotype is similar to that observed at interphase by Mimura et al. who also  
demonstrated that Nup153 is critical for de-phosphorylation of LBR in interphase, which  
272 in turn promotes its proper localization at the nuclear rim (Mimura et al., 2016). A similar  
mechanism may be employed during initial stages of nuclear formation. Here, the

274 significance is that Nup153 appears important to the incorporation of many non-core NE  
275 proteins during a distinct phase of NE formation and, further, targeting heterogeneity is  
276 exposed by the different phenotypes elicited for specific NE proteins when Nup153  
277 function is impaired. The reliance on Nup153 for targeting of specific NE residents  
278 instead reveals an unanticipated role for this nucleoporin in shaping the NE repertoire,  
279 and the distinct phenotypes observed (i.e., focal concentration at NE-like domains or  
280 ER-wide dispersal) reveal additional complexity in protein trafficking requirements of  
individual INM residents.

282

### **Nup153 is required to establish a normal INM protein repertoire specifically during nuclear assembly**

284 To determine whether dependence on Nup153 for protein targeting to the NE is  
285 restricted to newly forming nuclei, we employed an inducible degradation system to  
286 control Nup153 levels (Aksenova et al., 2020). This technique allows for rapid depletion,  
287 enabling the assessment of whether NE phenotypes require passage through mitosis.  
288 Using DLD-1 cells, a colorectal adenocarcinoma cell line, in which an auxin-inducible  
289 degron (AID) and a NeonGreen moiety were biallelically introduced in-frame at the  
290 endogenous NUP153 loci (Aksenova et al., 2020), we tracked lamin B2 ~15 hours after  
291 auxin addition. During incubation with auxin, cells were either allowed to divide normally  
292 or kept in thymidine (added 8h before the time of auxin addition) to prevent progression  
293 into mitosis. Levels of Nup153 were confirmed to be similarly reduced under these  
294 conditions, as tracked using immunoblot (Figure 6A). As DLD1 cells are not flat and  
295 tend to grow in clusters, identifying cells joined by a midbody structure was difficult to do  
296 with accuracy. We therefore identified individual nuclei with DNA stain and scored  
297 whether the corresponding lamin B2 was localized in foci rather than a peripheral  
298 nuclear rim. Auxin-mediated depletion of Nup153 robustly recapitulated the lamin B2  
299 localization phenotype, with  $53.6 \pm 5.4\%$  of nuclei associated with lamin B2 in foci  
300 compared to  $8.5 \pm 0.9\%$  in vehicle treated cells (Figure 6B-C). Some focal lamin B2 was  
301 seen in control conditions; we noted that this was largely detected when the nuclei were  
302 in pairs, indicating they were newly formed sister cells (Figure 6B). The pattern of lamin  
303 B2 under these conditions was a qualitatively milder phenotype than following auxin-  
304 mediated Nup153 depletion and may reflect an intermediate step in nuclear assembly  
305 more evident in DLD1 cells. Lamin B2 levels remained similar in the absence or  
306 presence of Nup153 (Figure 6A). Importantly, when cell division was blocked in G1/S by  
307 thymidine treatment, focal lamin B2 was seen in very few cells – this phenotypic  
308 suppression was particularly striking in cells depleted of Nup153 (Figure 6C). Thus, the  
309 role for Nup153 is critical only when nuclear formation takes place (Figure 7).

312

### **Discussion:**

314 *Nuclear envelope formation relies on Nup153.* We previously probed the localization of  
315 lamin A following Nup153 depletion and concluded it was defective under this condition  
316 (Mackay et al., 2010). In following up on this observation, however, we found that the  
317 antibody we had employed, while marketed as an anti-lamin A antibody, was a pan-  
318 lamin antibody. Here, we used antibodies specific for each isoform and this revealed  
that the reliance on Nup153 is significantly more profound for B-type lamins. The



320 specificity of this phenotype prompted us to consider membrane-associated proteins  
321 more broadly, and this inroad led to a new appreciation of a role for Nup153 in targeting  
322 a subset of integral membrane proteins to the INM during nuclear assembly. This  
323 phenotype was seen in three different cell lines (Hela, RPE1, and DLD1) and was  
324 elicited either by depletion of Nup153 (using two independent oligos or auxin-mediated  
325 degradation) or by expression of a dominant negative acting fragment of Nup153.

326  
327 A similar dependence of B-type lamins on the nucleoporin ELYS has been reported  
328 (Jevtic et al., 2019), reinforcing the interconnected roles of these two Nups (Mimura et  
329 al., 2016). Yet, there are several distinctions between the contributions made by ELYS  
330 and Nup153 to nuclear assembly. First, ELYS has been shown to be crucial for early  
331 INM protein targeting events in anaphase that establish the core subdomain (Clever et  
332 al., 2012; Clever et al., 2013), whereas Nup153 appears dispensable for this aspect of  
333 nuclear assembly (Supplemental Figure 2). Second, ELYS plays a key role in post-  
334 mitotic NPC formation (Doucet et al., 2010; Franz et al., 2007; Rasala et al., 2006),  
335 while Nup153 is implicated in the ‘interphasic’ pathway of pore assembly (Vollmer et al.,  
336 2015). One possibility is that ELYS and Nup153 converge via a distinct and shared role  
337 to cooperatively contribute to lamin B localization. Alternatively, early defects in nuclear  
338 formation that arise from ELYS depletion may lead indirectly to aberrant B-type lamin  
339 targeting by preventing Nup153 from performing its function in this process at the time  
340 of NE expansion.

342 Persistence of LBR in the ER is a distinct phenotype that has also been observed when  
343 ELYS is depleted (Mimura et al., 2016). Notably, this phenotype arises very early in  
344 nuclear assembly and continues through interphase. The contribution of Nup153 to LBR  
345 targeting at interphase was reported previously (Mimura et al., 2016), and here we have  
346 found that this is also the case earlier, at a time coinciding with nuclear formation. In the  
347 case of ELYS, this phenotype has been attributed to its ability to interact directly with  
348 LBR and influence its phospho-regulation by the phosphatase PP1. Nup153 may  
349 participate in this pathway cooperatively or may independently reinforce this role.

350  
351 Our finding that interference of Nup153, but not of Nup50 or Tpr, leads to a distinctive  
352 NE phenotype (Figure 2) is significant because it implicates Nup153 in having a role  
353 independent of its structural partners at the nuclear pore. Moreover, this finding  
354 uncouples roles that have been attributed to these other Nups and their contributions to  
355 parallel steps during NE formation. Such functions include a recently characterized role  
356 for Nup50 in regulating the Ran pathway via stimulation of its guanine nucleotide  
357 exchange factor RCC1 (Holzer et al., 2021). Future studies to elucidate the role of  
358 Nup153 and to parse the contribution of other nucleoporins during NE formation will be  
359 enabled by the information gained here on 1) the timing of dependence on Nup153 for  
360 NE protein targeting and 2) the identity of a specific subset of NE proteins dependent on  
361 Nup153 for targeting.

362  
363 *A multistage framework for nuclear assembly and maintenance.* During nuclear  
364 formation, initial recruitment of NE residents to the main chromatin mass occurs  
365 relatively non-specifically, mediated by multiple protein-DNA/chromatin interactions

366 attracting membrane to the chromatin surface (Anderson et al., 2009). Enrichment of  
368 core domain proteins rapidly ensues as they are attracted from the non-core periphery  
of the disk to concentrate at the central core region (Dechat et al., 2004; Haraguchi et  
al., 2008; Haraguchi et al., 2001). In the case of LEM2, we previously found that this  
370 recruitment relies on interactions with both the chromatin-associated protein BAF and  
spindle microtubules that remain attached to the disk at this time (von Appen et al.,  
372 2020). Following microtubule remodeling and ESCRT-mediated membrane closure, the  
sealed nuclear membrane must further expand to accommodate chromatin as it  
374 decondenses. How ongoing addition of proteins and lipids from the ER is accomplished  
is incompletely understood, but the results here indicate that Nup153 has a role in  
376 delivery of NE residents at this step. Specifically, our results identify a role for Nup153  
as the NE expands following closure (Figure 7).

378  
There are several noteworthy aspects about the requirement for Nup153 during nuclear  
380 envelope formation. First, we show that this role is important only for a subset of NE  
proteins, so it is not linked to a general expansion of the NE compartment. Second,  
382 those proteins affected by impairment of Nup153 function are primarily ones that are  
considered 'non-core' residents (LBR, SUN1, LAP2 $\beta$ , lamin B1, lamin B2). Thus,  
384 unexpectedly, even at a time when core and non-core domains no longer persist, these  
two categories of NE proteins differ in targeting requirements. It is likely too simplistic to  
386 view this as strictly a core/non-core dichotomy, but nonetheless these findings point to  
unexpected functional distinctions in NE protein targeting requirements at this step of  
388 nuclear assembly. Third, loss of Nup153 does not impact initial steps of nuclear  
formation, nor does it persist at interphase except in the case of LBR targeting. This  
390 suggests that building and maintaining the NE is a multi-phase process with distinct  
molecular steps mediating targeting of membrane and membrane-associated proteins.

392  
This study provides a framework for understanding distinct facets of nuclear assembly  
394 and builds the groundwork for mechanistic dissection of the particular role(s) played by  
Nup153 during these steps. Nup153 has many attributes that may be key, including its  
396 ability to bind a wide range of partner proteins --e.g., transport factors, SUMO  
proteases, lamins, chromatin architectural proteins (Al-Haboubi et al., 2011; Chow et al.,  
398 2012; Hang and Dasso, 2002; Kadota et al., 2020; Nakielny et al., 1999; Vagnarelli et  
al., 2011; Zhang et al., 2002). The altered delivery of particular proteins to the NE may  
400 contribute further to the NE assembly phenotype. For instance, SUN1 has been  
implicated in chromatin decondensation and nuclear growth (Chi et al., 2007), thus its  
402 defective recruitment to the newly forming NE may alter the capacity for other proteins  
to recruit to this site.

404  
As interference in Nup153 function also results in an active abscission checkpoint that  
406 controls the timing of the last step in cytokinesis (Mackay et al., 2010), it is tempting to  
speculate that the NE expansion step is under surveillance at this juncture. However,  
408 through the course of our experiments, we did not always see NE mislocalization  
phenotypes in cells halted with checkpoint activity at the midbody stage. Nonetheless,  
410 further studies are required to delineate whether NE protein targeting is required to

412 satisfy the abscission checkpoint, as it is possible that a nuclear defect at this time does  
413 not always manifest as the full-blown phenotype tracked in this study.

414 *Insights into the NE repertoire at parental and micronuclei.* A theme that has been  
415 observed for micronuclei is their distinctive repertoire of NE proteins. This composition,  
416 which is often rich in core domain proteins and sparse in non-core proteins (Liu et al.,  
417 2018), leads to aberrant nuclear architecture and fragility and, in turn, a high potential  
418 for the collapse of NE integrity at micronuclei that is thought to contribute to genomic  
419 instability in tumors (Hatch et al., 2013; Liu et al., 2018; Zhang et al., 2015). Indeed,  
420 micronuclei lacking lamin B were specifically found to be prone to DNA damage  
421 (Kneissig et al., 2019). Our results here indicate that the low numbers of nuclear pore  
422 constituents, and low levels of Nup153 in particular (Hatch et al., 2013; Liu et al., 2018),  
423 at micronuclei may contribute to this pathological biogenesis in a way that was not  
424 previously recognized. Specifically, the role that Nup153 plays in ensuring non-core NE  
425 residents are recruited to nascent nuclei may be reduced at micronuclei and, at least in  
426 certain cases, there may not be an alternative route at interphase that allows this  
427 deficiency to recover, as we have seen happens in parent nuclei.

428 Notably, in cases where micronuclei form via a route that does not preclude non-core  
429 protein recruitment and NE expansion, the resulting NE are more stable and these  
430 micronuclei are not associated with tumorigenesis (Sepaniac et al., 2021). Such a  
431 situation is seen in KIF18A knockout mice, in which micronuclei arise following  
432 chromosome misalignment. It has been proposed that proximity of these micronuclei to  
433 ER membrane stores near the mitotic spindle may promote formation of stable NE. It  
434 will be of interest to determine whether recruitment of Nup153 is enhanced under these  
435 circumstances and plays a role in facilitating targeting of non-core residents to create a  
436 more robust NE. Ultimately, expanding our knowledge of requirements for INM protein  
437 recruitment throughout the cell cycle will clarify how cells maintain genomic stability and  
438 will lend insight into how this process goes awry at micronuclei.

440

## Materials and methods

442

### Cell culture and lines:

444 HeLa cells were a gift from Maureen Powers and RPE-1 cells were a gift from Bruce  
Edgar (RRID:CVCL 4388) and the identity of both cell types were confirmed by STR  
446 profiling. HeLa and RPE-1 cells were grown in DMEM supplemented with 10% fetal  
bovine serum at 37°C with 5% CO<sub>2</sub>. RPE-1 cells are immortalized by the presence of  
448 hTERT, expression of which was maintained by continued hygromycin treatment. HeLa  
cells stably expressing GFP-lamin B2 and LEM2-mCherry together were established  
450 previously (von Appen et al., 2020). HeLa cells stably expressing H2B-mCherry were  
established previously (Mackay et al., 2010) and used to generate cells co-expressing  
452 the GFP-lamin B2 construct from Bob Goldman. Cells expressing BFP-Sec61 $\beta$  were  
generated from a construct from Gia Voeltz obtained through Addgene (plasmid  
454 #49154; <http://n2t.net/addgene:49154>; RRID:Addgene\_49154) (Zurek et al., 2011).  
Stable cell lines were established by transfecting plasmids using Lipofectamine 2000 or  
456 Lipofectamine 3000 (Invitrogen), as per the manufacturer's instructions, and selecting  
for puromycin or G418 resistance. Single colonies were expanded and screened for  
458 expression. Cell lines stably expressing Tet-inducible GFP or GFP-tagged Nup153-C  
were established and protein expression was induced as previously described (Mackay  
460 et al., 2010). DLD1 cells were established previously and maintained as described  
(Aksenova et al., 2020).

462

### Auxin-mediated Nup153 degradation

464 DLD1-Nup153<sup>AID</sup> cells were plated at 140K per well on glass coverslips and cultured for  
8 hours in the absence or presence of 5 mM thymidine (Calbiochem). 1 mM Indole-3-  
466 acetic acid (IAA, referred to here as auxin; Sigma-Aldrich) was then added to half of the  
cells from each condition and cells were cultured an additional 15 hours, continuing with  
468 and without thymidine. Cells were fixed for immunofluorescence. Parallel cultures in 6-  
well dishes seeded with 700K cells were treated identically and whole cell lysates for  
470 immunoblot.

### RNA interference

472 HeLa or RPE-1 cells were transfected with Lipofectamine RNAiMAX (Invitrogen) and  
final concentration of 10 nM siRNA oligonucleotides: siCon,  
474 GCAAUCUCCGAUCGUAGA (Mackay et al., 2009), si153,  
GGACUUGUUAGAUCUAGUU, (Mackay et al., 2009), si153-1 (Harborth et al., 2001),  
476 si50 (Ogawa et al., 2010), siTpr (Mackay et al., 2010), where indicated. Cells were  
478 assessed 48 hours after transfection for asynchronous experiments.

### HeLa cell synchronization

480 At the time of plating or eight hours after plating cells with siRNA transfection mixture,  
482 2mM thymidine was added to the cells without changing medium containing the  
transfection mixture. After 24 hours, cells were rinsed thoroughly three times with PBS  
484 before exchanging with complete culture medium without transfection mixture. To track  
the kinetics of release from G1/S arrest, cells were assessed 10 and 16 hours after

486 thymidine wash-out. All other synchronization experiments assessing Nup153-depletion  
phenotypes were fixed 16 hours following thymidine wash-out.

488

#### Microscopy

490 For live cell imaging, cells were plated with siRNA transfection mixture on untreated  
25mm glass-bottomed MatTek dishes. After 48 hours, medium was exchanged for  
492 phenol-free imaging medium supplemented with 10% FBS. Mitotic cells were imaged  
using spinning disk confocal microscopy at 37°C with 5% CO<sub>2</sub> on a Nikon Eclipse Ti  
494 microscope with a 60x objective. Images were acquired using Metamorph software.  
Cells stably expressing GFP-lamin B2 and H2B-mCherry were imaged every 3 minutes.  
496 Cells stably expressing GFP-lamin B2 and LEM2-mCherry were imaged 1 hour  
following the addition of NucBlue (Invitrogen), per manufacturer's instructions, and  
498 imaged every 15s. Fixed imaging was performed by spinning disk confocal microscopy  
(Nikon Eclipse Ti; Metamorph) or by widefield microscopy (Zeiss Axioskop 2 with 63x  
500 objective; Zeiss Axiovision and Zeiss Zen Blue).

#### Data analysis

502 Plot line profile analysis was performed on raw images acquired by spinning disk  
504 confocal microscopy using the 'Plot Profile' function in ImageJ.

506 For comparison of SUN1 and SUN2 enrichment at ectopic foci relative to the nuclear  
envelope following Nup153-depletion, nuclei were defined as ROIs using DAPI while  
508 ectopic SUN1 was used to define ROIs characteristic of the Nup153-depletion  
phenotype using Zeiss Zen Blue semi-automated Image Analysis module. The ratio of  
510 mean fluorescence (arbitrary units) of ectopic to nuclear SUN1 and SUN2 were  
calculated and plotted from three independent experiments.

512

To obtain the cytoplasmic to nuclear LBR ratio in cells treated with either siRNA  
514 targeting Nup153 or control siRNA, the fluorescence intensity of LBR in the nucleus  
(identified with DAPI staining) and in the cytoplasm of midbody stage (identified using  
516 tubulin staining) cells was measured using ImageJ. The fluorescence intensity at the  
nucleus was measured using a circle 5 microns in diameter placed at the center of each  
518 nucleus. The intensity at the cytoplasm was measured using two circles 5 microns in  
diameter placed on opposite sides of the midbody. The mean intensities were measured  
520 and used to obtain the cytoplasmic to nuclear LBR ratios for each cell. Only Nup153-  
depleted cells that had ectopic LaminB2 foci were quantified.

522

All plots generated using GraphPad Prism.

524

#### Immunofluorescence

526 Cells were plated on untreated coverslips for experimental manipulation and fixed in  
either -20°C methanol for 5-10 minutes or 2% paraformaldehyde for 15 minutes.  
528 Primary and secondary antibody incubations were performed in blocking buffer for 1  
hour at room temperature. Primary antibodies are as follows: rabbit  $\alpha$ -Aurora B pT232  
530 (Rockland 600-401-677); mouse  $\alpha$ -lamin A/C (Cell Signaling 4C11); rabbit  $\alpha$ -lamin B1  
(Abcam ab16408); mouse  $\alpha$ -lamin B2 (Abcam ab8983); hamster  $\alpha$ -Lap2 $\alpha$  (gift from Joe

532 Glavy); mouse  $\alpha$ -Lap2 $\beta$  (gift from Brian Burke); rabbit  $\alpha$ -LBR (Abcam ab32535); mouse  
534  $\alpha$ -Nup153 (SA1; gift from Brian Burke); rabbit  $\alpha$ -POM121 (GeneTex GTX102128); rabbit  
 $\alpha$ -SUN1 (Abcam ab124770); mouse  $\alpha$ -SUN2 (gift from Brian Burke); rabbit  $\alpha$ -Tubulin  
(Abcam ab18251); rat  $\alpha$ -Tubulin (Abcam ab6160); chicken  $\alpha$ -Tubulin (Synaptic systems;  
536 302 206)] followed by AlexaFluor conjugated secondary antibodies (ThermoFisher).  
Coverslips were mounted on slides using DAPI Prolong Gold, per manufacturer's  
538 instructions (Invitrogen).

#### 540 Immunoblotting

541 Cells were plated in 6-well dishes and experimentally manipulated in parallel with  
542 immunofluorescence experiments where applicable. Cells were harvested by scraping  
and pelleting by centrifugation. DLD1 lysates were prepared in RIPA buffer (150 mM  
544 NaCl, 0.5% NP-40, 0.1% SDS, 50 mM Tris-HCL pH 8, 100 mM NaF, 0.2 mM Sodium  
orthovanadate) and HeLa cell lysates were prepared in NP40 lysis buffer (250 mM  
546 NaCl, 1% NP-40, 50 mM Tris pH 7.4, 5 mM EDTA, 50 mM NaF, 1 mM Sodium  
orthovanadate). Lysates were cleared by centrifugation and quantified by Pierce  
548 Coomassie Bradford Assay Reagent (ThermoFisher). Samples were prepared at equal  
concentrations in SDS loading buffer, boiled, and resolved by SDS-PAGE. Following  
550 wet transfer, PVDF membranes were blocked in 3% milk in TBS-T (0.1% Tween-20 in  
Tris-buffered saline). Primary and secondary antibody incubations were also performed  
552 in 3% milk in TBS-T at room temperature for 1 hr each. For enhanced  
chemiluminescence detection, secondary antibodies conjugated with HRP  
554 (ThermoFisher) were detected using Western Lightning PLUS ECL (PerkinElmer,  
Waltham, MA) on Hyblot CL film (Thomas Scientific, Swedesboro, NJ). Alternatively,  
556 secondary antibodies conjugated with near-infrared fluorescent dyes (Abcam,  
Cambridge, UK) were detected using a Li-Cor Odyssey Infrared scanner.

558  
559 Lysates from HeLa cells transiently expressing GFP-lamin fusions (gift from Bob  
560 Goldman) following transfection with Lipofectamine LTX (ThermoFisher) were used to  
test lamin antibody specificity by probing immunoblots with mouse  $\alpha$ -lamin A/C (Cell  
562 Signaling 4C11), mouse  $\alpha$ -lamin B1 (Abcam ab16408), mouse  $\alpha$ -lamin B2 (Abcam  
ab8983), and rabbit  $\alpha$ -GFP (Abcam ab290). Nucleoporin depletion was confirmed using  
564 the indicated antibodies: mouse  $\alpha$ -Nup153 (SA1; gift from Brian Burke), rabbit  $\alpha$ -Nup50  
(custom antibody (Mackay et al., 2010)), rabbit  $\alpha$ -Nup155 (Genetex GTX120945), and  
566 rabbit  $\alpha$ -Tpr; Bethyl Laboratories IHC-00099-1). DLD1 lysates were probed for Nup153  
(SA1), mouse  $\alpha$ -lamin B2 (Abcam ab8983),  $\alpha$ -vinculin (Sigma V9131).

570  
**Acknowledgements:** We would like to thank Suzanne Elgort for her contributions to  
572 the initiation of this project and Dr. Michelle Mendoza for providing advice as well as  
access to a spinning disk confocal microscope. We thank Drs. Bob Goldman, Joe  
574 Glavy, and Brian Burke for sharing reagents, as indicated in Materials and Methods.  
This work was supported by R01GM131052 (KSU) and an Allen Distinguished  
576 Investigator Award, a Paul G. Allen Frontiers Group advised grant of the Paul G. Allen  
Family Foundation (MN and KSU).

578 **References:**

- 580 Aksenova, V., Smith, A., Lee, H., Bhat, P., Esnault, C., Chen, S., Iben, J., Kaufhold, R., Yau, K.C., Echeverria, C., *et al.* (2020). Nucleoporin TPR is an integral component of the TREX-2 mRNA export pathway. *Nat Commun* 11, 4577.
- 582 Al-Haboubi, T., Shumaker, D.K., Koser, J., Wehnert, M., and Fahrenkrog, B. (2011). Distinct association of the nuclear pore protein Nup153 with A- and B-type lamins. *Nucleus* 2, 500-509.
- 584 Anderson, D.J., and Hetzer, M.W. (2008). Reshaping of the endoplasmic reticulum limits the rate for nuclear envelope formation. *J Cell Biol* 182, 911-924.
- 586 Anderson, D.J., Vargas, J.D., Hsiao, J.P., and Hetzer, M.W. (2009). Recruitment of functionally distinct membrane proteins to chromatin mediates nuclear envelope formation in vivo. *J Cell Biol* 186, 183-191.
- 588 Ball, J.R., and Ullman, K.S. (2005). Versatility at the nuclear pore complex: lessons learned from the nucleoporin Nup153. *Chromosoma* 114, 319-330.
- 590 Boni, A., Politi, A.Z., Strnad, P., Xiang, W., Hossain, M.J., and Ellenberg, J. (2015). Live imaging and modeling of inner nuclear membrane targeting reveals its molecular requirements in mammalian cells. *J Cell Biol* 209, 705-720.
- 592 Chi, Y.H., Haller, K., Peloponese, J.M., Jr., and Jeang, K.T. (2007). Histone acetyltransferase hALP and nuclear membrane protein hsSUN1 function in de-condensation of mitotic chromosomes. *J Biol Chem* 282, 27447-27458.
- 594 Chow, K.H., Elgort, S., Dasso, M., and Ullman, K.S. (2012). Two distinct sites in Nup153 mediate interaction with the SUMO proteases SENP1 and SENP2. *Nucleus* 3, 349-358.
- 598 Clever, M., Funakoshi, T., Mimura, Y., Takagi, M., and Imamoto, N. (2012). The nucleoporin ELYS/Mel28 regulates nuclear envelope subdomain formation in HeLa cells. *Nucleus* 3, 187-199.
- 600 Clever, M., Mimura, Y., Funakoshi, T., and Imamoto, N. (2013). Regulation and coordination of nuclear envelope and nuclear pore complex assembly. *Nucleus* 4, 105-114.
- 602 Crisp, M., Liu, Q., Roux, K., Rattner, J.B., Shanahan, C., Burke, B., Stahl, P.D., and Hodzic, D. (2006). Coupling of the nucleus and cytoplasm: role of the LINC complex. *J Cell Biol* 172, 41-53.
- 604 de Castro, I.J., Gil, R.S., Ligammari, L., Di Giacinto, M.L., and Vagnarelli, P. (2018). CDK1 and PLK1 coordinate the disassembly and reassembly of the nuclear envelope in vertebrate mitosis. *Oncotarget* 9, 7763-7773.
- 606 Dechat, T., Gajewski, A., Korbei, B., Gerlich, D., Daigle, N., Haraguchi, T., Furukawa, K., Ellenberg, J., and Foisner, R. (2004). LAP2alpha and BAF transiently localize to telomeres and specific regions on chromatin during nuclear assembly. *J Cell Sci* 117, 6117-6128.
- 610 Dobrynin, G., Popp, O., Romer, T., Bremer, S., Schmitz, M.H., Gerlich, D.W., and Meyer, H. (2011). Cdc48/p97-Ufd1-Npl4 antagonizes Aurora B during chromosome segregation in HeLa cells. *J Cell Sci* 124, 1571-1580.
- 612 Dou, Z., Xu, C., Donahue, G., Shimi, T., Pan, J.A., Zhu, J., Ivanov, A., Capell, B.C., Drake, A.M., Shah, P.P., *et al.* (2015). Autophagy mediates degradation of nuclear lamina. *Nature* 527, 105-109.
- 616 Doucet, C.M., and Hetzer, M.W. (2010). Nuclear pore biogenesis into an intact nuclear envelope. *Chromosoma* 119, 469-477.
- 618

- 620 Doucet, C.M., Talamas, J.A., and Hetzer, M.W. (2010). Cell cycle-dependent differences in nuclear pore complex assembly in metazoa. *Cell* *141*, 1030-1041.
- 622 Dultz, E., and Ellenberg, J. (2010). Live imaging of single nuclear pores reveals unique assembly kinetics and mechanism in interphase. *J Cell Biol* *191*, 15-22.
- 624 Ellenberg, J., Siggia, E.D., Moreira, J.E., Smith, C.L., Presley, J.F., Worman, H.J., and Lippincott-Schwartz, J. (1997). Nuclear membrane dynamics and reassembly in living cells: targeting of an inner nuclear membrane protein in interphase and mitosis. *J Cell Biol* *138*, 1193-1206.
- 628 Franz, C., Walczak, R., Yavuz, S., Santarella, R., Gentzel, M., Askjaer, P., Galy, V., Hetzer, M., Mattaj, I.W., and Antonin, W. (2007). MEL-28/ELYS is required for the recruitment of nucleoporins to chromatin and postmitotic nuclear pore complex assembly. *EMBO Rep* *8*, 165-172.
- 630
- 632 Hang, J., and Dasso, M. (2002). Association of the human SUMO-1 protease SENP2 with the nuclear pore. *J Biol Chem* *277*, 19961-19966.
- 634 Haraguchi, T., Kojidani, T., Koujin, T., Shimi, T., Osakada, H., Mori, C., Yamamoto, A., and Hiraoka, Y. (2008). Live cell imaging and electron microscopy reveal dynamic processes of BAF-directed nuclear envelope assembly. *J Cell Sci* *121*, 2540-2554.
- 636
- 638 Haraguchi, T., Koujin, T., Segura-Totten, M., Lee, K.K., Matsuoka, Y., Yoneda, Y., Wilson, K.L., and Hiraoka, Y. (2001). BAF is required for emerin assembly into the reforming nuclear envelope. *J Cell Sci* *114*, 4575-4585.
- 640 Harborth, J., Elbashir, S.M., Bechert, K., Tuschl, T., and Weber, K. (2001). Identification of essential genes in cultured mammalian cells using small interfering RNAs. *J Cell Sci* *114*, 4557-4565.
- 642
- 644 Hase, M.E., and Cordes, V.C. (2003). Direct interaction with nup153 mediates binding of Tpr to the periphery of the nuclear pore complex. *Mol Biol Cell* *14*, 1923-1940.
- 646 Hatch, E.M., Fischer, A.H., Deerinck, T.J., and Hetzer, M.W. (2013). Catastrophic nuclear envelope collapse in cancer cell micronuclei. *Cell* *154*, 47-60.
- 648 Hetzer, M., Meyer, H.H., Walther, T.C., Bilbao-Cortes, D., Warren, G., and Mattaj, I.W. (2001). Distinct AAA-ATPase p97 complexes function in discrete steps of nuclear assembly. *Nat Cell Biol* *3*, 1086-1091.
- 650 Holzer, G., De Magistris, P., Gramminger, C., Sachdev, R., Magalska, A., Schooley, A., Scheufen, A., Lennartz, B., Tatarek-Nossol, M., Lue, H., *et al.* (2021). The nucleoporin Nup50 activates the Ran guanine nucleotide exchange factor RCC1 to promote NPC assembly at the end of mitosis. *EMBO J* *40*, e108788.
- 652
- 654 Jevtic, P., Schibler, A.C., Wesley, C.C., Pegoraro, G., Misteli, T., and Levy, D.L. (2019). The nucleoporin ELYS regulates nuclear size by controlling NPC number and nuclear import capacity. *EMBO Rep* *20*.
- 656
- 658 Kadota, S., Ou, J., Shi, Y., Lee, J.T., Sun, J., and Yildirim, E. (2020). Nucleoporin 153 links nuclear pore complex to chromatin architecture by mediating CTCF and cohesin binding. *Nat Commun* *11*, 2606.
- 660 King, M.C., Lusk, C.P., and Blobel, G. (2006). Karyopherin-mediated import of integral inner nuclear membrane proteins. *Nature* *442*, 1003-1007.



- 662 Kneissig, M., Keuper, K., de Pagter, M.S., van Roosmalen, M.J., Martin, J., Otto, H., Passerini,  
664 V., Campos Sparr, A., Renkens, I., Kropveld, F., *et al.* (2019). Micronuclei-based model system  
reveals functional consequences of chromothripsis in human cells. *Elife* 8.
- LaJoie, D., and Ullman, K.S. (2017). Coordinated events of nuclear assembly. *Curr Opin Cell  
666 Biol* 46, 39-45.
- Liu, S., Kwon, M., Mannino, M., Yang, N., Renda, F., Khodjakov, A., and Pellman, D. (2018).  
668 Nuclear envelope assembly defects link mitotic errors to chromothripsis. *Nature* 561, 551-555.
- Liu, S., and Pellman, D. (2020). The coordination of nuclear envelope assembly and  
670 chromosome segregation in metazoans. *Nucleus* 11, 35-52.
- Lokareddy, R.K., Hapsari, R.A., van Rheenen, M., Pumroy, R.A., Bhardwaj, A., Steen, A.,  
672 Veenhoff, L.M., and Cingolani, G. (2015). Distinctive Properties of the Nuclear Localization  
Signals of Inner Nuclear Membrane Proteins Heh1 and Heh2. *Structure* 23, 1305-1316.
- 674 Lu, L., Ladinsky, M.S., and Kirchhausen, T. (2009). Cisternal organization of the endoplasmic  
reticulum during mitosis. *Mol Biol Cell* 20, 3471-3480.
- 676 Lu, L., Ladinsky, M.S., and Kirchhausen, T. (2011). Formation of the postmitotic nuclear  
envelope from extended ER cisternae precedes nuclear pore assembly. *J Cell Biol* 194, 425-  
678 440.
- Mackay, D.R., Elgort, S.W., and Ullman, K.S. (2009). The nucleoporin Nup153 has separable  
680 roles in both early mitotic progression and the resolution of mitosis. *Mol Biol Cell* 20, 1652-1660.
- Mackay, D.R., Makise, M., and Ullman, K.S. (2010). Defects in nuclear pore assembly lead to  
682 activation of an Aurora B-mediated abscission checkpoint. *J Cell Biol* 191, 923-931.
- Maeshima, K., Yahata, K., Sasaki, Y., Nakatomi, R., Tachibana, T., Hashikawa, T., Imamoto, F.,  
684 and Imamoto, N. (2006). Cell-cycle-dependent dynamics of nuclear pores: pore-free islands and  
lamins. *J Cell Sci* 119, 4442-4451.
- 686 Meinema, A.C., Laba, J.K., Hapsari, R.A., Otten, R., Mulder, F.A., Kralt, A., van den Bogaart,  
G., Lusk, C.P., Poolman, B., and Veenhoff, L.M. (2011). Long unfolded linkers facilitate  
688 membrane protein import through the nuclear pore complex. *Science* 333, 90-93.
- Mimura, Y., Takagi, M., Clever, M., and Imamoto, N. (2016). ELYS regulates the localization of  
690 LBR by modulating its phosphorylation state. *J Cell Sci* 129, 4200-4212.
- Mukherjee, R.N., Salle, J., Dmitrieff, S., Nelson, K.M., Oakey, J., Minc, N., and Levy, D.L.  
692 (2020). The Perinuclear ER Scales Nuclear Size Independently of Cell Size in Early Embryos.  
*Dev Cell* 54, 395-409 e397.
- 694 Nakielny, S., Shaikh, S., Burke, B., and Dreyfuss, G. (1999). Nup153 is an M9-containing  
mobile nucleoporin with a novel Ran-binding domain. *EMBO J* 18, 1982-1995.
- 696 Ogawa, Y., Miyamoto, Y., Asally, M., Oka, M., Yasuda, Y., and Yoneda, Y. (2010). Two  
isoforms of Npap60 (Nup50) differentially regulate nuclear protein import. *Mol Biol Cell* 21, 630-  
698 638.
- Ohba, T., Schirmer, E.C., Nishimoto, T., and Gerace, L. (2004). Energy- and temperature-  
700 dependent transport of integral proteins to the inner nuclear membrane via the nuclear pore. *J  
Cell Biol* 167, 1051-1062.

- 702 Otsuka, S., Bui, K.H., Schorb, M., Hossain, M.J., Politi, A.Z., Koch, B., Eltsov, M., Beck, M., and  
704 Ellenberg, J. (2016). Nuclear pore assembly proceeds by an inside-out extrusion of the nuclear  
envelope. *Elife* 5.
- Otsuka, S., and Ellenberg, J. (2018). Mechanisms of nuclear pore complex assembly - two  
706 different ways of building one molecular machine. *FEBS Lett* 592, 475-488.
- Otsuka, S., Tempkin, J.O.B., Politi, A.Z., Rybina, A., Hossain, M.J., Kueblbeck, M., Callegari, A.,  
708 Koch, B., Sali, A., and Ellenberg, J. (2021). A quantitative map of nuclear pore assembly reveals  
two distinct mechanisms. *bioRxiv*, 2021.2005.2017.444137.
- 710 Pawar, S., Ungricht, R., Tiefenboeck, P., Leroux, J.C., and Kutay, U. (2017). Efficient protein  
targeting to the inner nuclear membrane requires Atlastin-dependent maintenance of ER  
712 topology. *Elife* 6.
- Penfield, L., Shankar, R., Szentgyorgyi, E., Laffitte, A., Mauro, M.S., Audhya, A., Muller-  
714 Reichert, T., and Bahmanyar, S. (2020). Regulated lipid synthesis and LEM2/CHMP7 jointly  
control nuclear envelope closure. *J Cell Biol* 219.
- 716 Rasala, B.A., Orjalo, A.V., Shen, Z., Briggs, S., and Forbes, D.J. (2006). ELYS is a dual  
nucleoporin/kinetochore protein required for nuclear pore assembly and proper cell division.  
718 *Proc Natl Acad Sci U S A* 103, 17801-17806.
- Rempel, I.L., Popken, P., Ghavami, A., Mishra, A., Hapsari, R.A., Wolters, A.H.G., Veldsink,  
720 A.C., Klaassens, M., Meinema, A.C., Poolman, B., *et al.* (2020). Flexible and Extended Linker  
Domains Support Efficient Targeting of Heh2 to the Inner Nuclear Membrane. *Structure* 28, 185-  
722 195 e185.
- Schellhaus, A.K., De Magistris, P., and Antonin, W. (2016). Nuclear Reformation at the End of  
724 Mitosis. *J Mol Biol* 428, 1962-1985.
- Sepaniac, L.A., Martin, W., Dionne, L.A., Stearns, T.M., Reinholdt, L.G., and Stumpff, J. (2021).  
726 Micronuclei in Kif18a mutant mice form stable micronuclear envelopes and do not promote  
tumorigenesis. *J Cell Biol* 220.
- 728 Stoten, C.L., and Carlton, J.G. (2018). ESCRT-dependent control of membrane remodelling  
during cell division. *Semin Cell Dev Biol* 74, 50-65.
- 730 Ungricht, R., Pawar, S., and Kutay, U. (2016). An In Vitro Assay to Study Targeting of  
Membrane Proteins to the Inner Nuclear Membrane. *Methods Mol Biol* 1411, 461-477.
- 732 Vagnarelli, P., Ribeiro, S., Sennels, L., Sanchez-Pulido, L., de Lima Alves, F., Verheyen, T.,  
Kelly, D.A., Ponting, C.P., Rappsilber, J., and Earnshaw, W.C. (2011). Repo-Man coordinates  
734 chromosomal reorganization with nuclear envelope reassembly during mitotic exit. *Dev Cell* 21,  
328-342.
- 736 Vietri, M., Schink, K.O., Campsteijn, C., Wegner, C.S., Schultz, S.W., Christ, L., Thoresen, S.B.,  
Brech, A., Raiborg, C., and Stenmark, H. (2015). Spastin and ESCRT-III coordinate mitotic  
738 spindle disassembly and nuclear envelope sealing. *Nature* 522, 231-235.
- Vietri, M., Schultz, S.W., Bellanger, A., Jones, C.M., Petersen, L.I., Raiborg, C., Skarpen, E.,  
740 Pedurupillay, C.R.J., Kjos, I., Kip, E., *et al.* (2020). Unrestrained ESCRT-III drives micronuclear  
catastrophe and chromosome fragmentation. *Nat Cell Biol* 22, 856-867.
- 742 Vollmer, B., Lorenz, M., Moreno-Andres, D., Bodenhofer, M., De Magistris, P., Astrinidis, S.A.,  
Schooley, A., Flotenmeyer, M., Leptihn, S., and Antonin, W. (2015). Nup153 Recruits the

- 744 Nup107-160 Complex to the Inner Nuclear Membrane for Interphasic Nuclear Pore Complex  
Assembly. *Dev Cell* 33, 717-728.
- 746 von Appen, A., LaJoie, D., Johnson, I.E., Trnka, M.J., Pick, S.M., Burlingame, A.L., Ullman,  
748 K.S., and Frost, A. (2020). LEM2 phase separation promotes ESCRT-mediated nuclear  
envelope reformation. *Nature* 582, 115-118.
- Vukovic, L.D., Jevtic, P., Zhang, Z., Stohr, B.A., and Levy, D.L. (2016). Nuclear size is sensitive  
750 to NTF2 protein levels in a manner dependent on Ran binding. *J Cell Sci* 129, 1115-1127.
- Willan, J., Cleasby, A.J., Flores-Rodriguez, N., Stefani, F., Rinaldo, C., Pisciottoni, A., Grant, E.,  
752 Woodman, P., Bryant, H.E., and Ciani, B. (2019). ESCRT-III is necessary for the integrity of the  
nuclear envelope in micronuclei but is aberrant at ruptured micronuclear envelopes generating  
754 damage. *Oncogenesis* 8, 29.
- Yang, L., Guan, T., and Gerace, L. (1997). Integral membrane proteins of the nuclear envelope  
756 are dispersed throughout the endoplasmic reticulum during mitosis. *J Cell Biol* 137, 1199-1210.
- Zhang, C.Z., Spektor, A., Cornils, H., Francis, J.M., Jackson, E.K., Liu, S., Meyerson, M., and  
758 Pellman, D. (2015). Chromothripsis from DNA damage in micronuclei. *Nature* 522, 179-184.
- Zhang, H., Saitoh, H., and Matunis, M.J. (2002). Enzymes of the SUMO modification pathway  
760 localize to filaments of the nuclear pore complex. *Mol Cell Biol* 22, 6498-6508.
- Zurek, N., Sparks, L., and Voeltz, G. (2011). Reticulon short hairpin transmembrane domains  
762 are used to shape ER tubules. *Traffic* 12, 28-41.

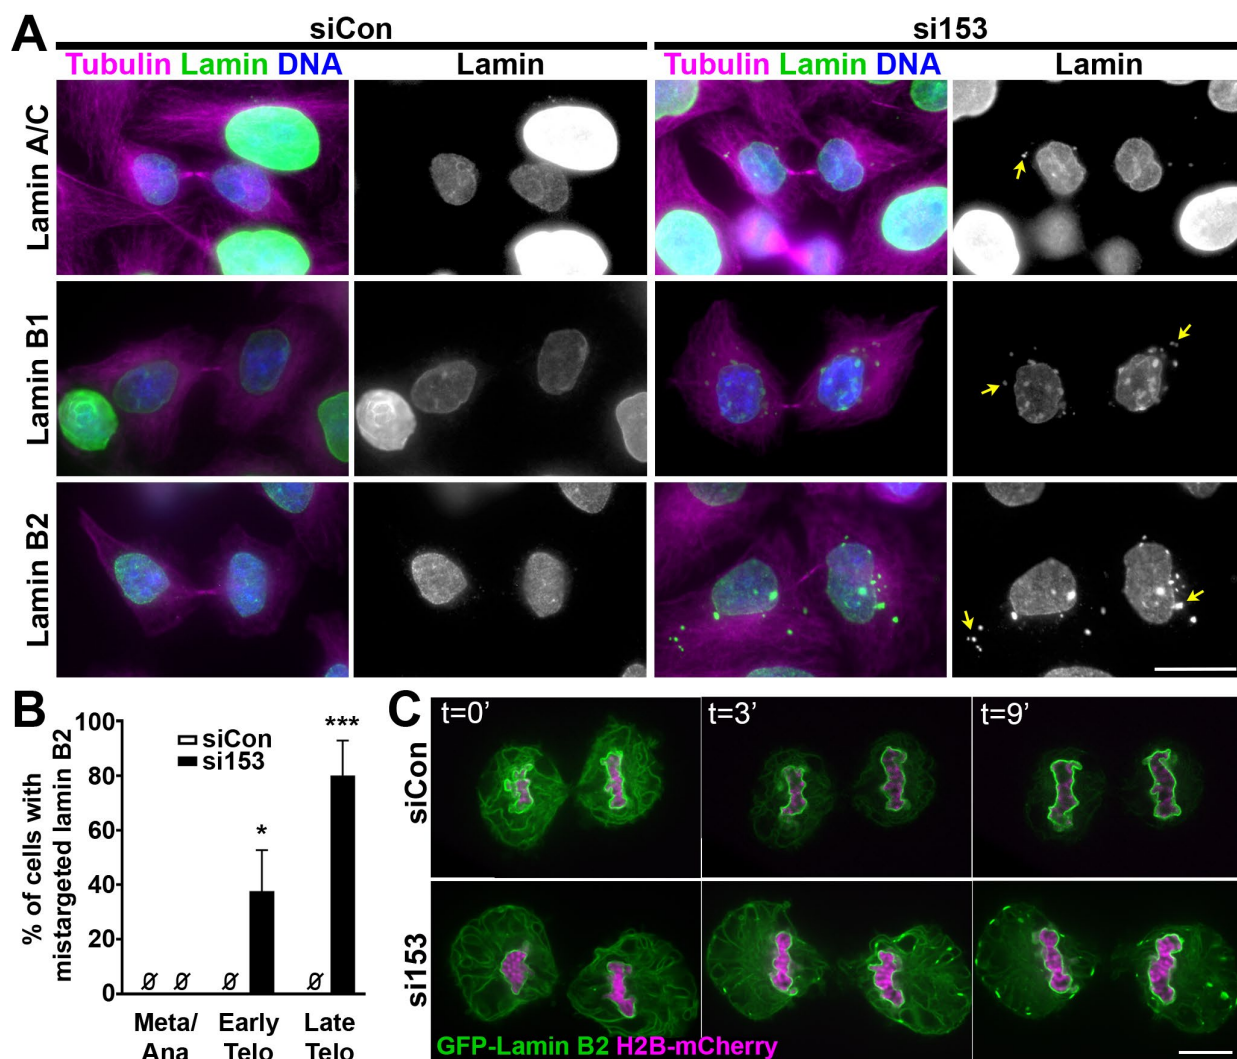

**Figure 1. Lamins B1/B2 accumulate at ectopic sites in telophase when Nup153 is depleted.** (A) Widefield microscopy showing representative images of lamins A/C, B1 and B2 in late telophase stage cells, after treatment with siControl (siCon) or siNup153 (si153) oligos for 48 hours. Yellow arrows indicate sites of lamin ectopic targeting. Scale bar 20  $\mu$ m. (B) Quantification of the percent of cells with endogenous lamin B2 at metaphase/anaphase (Meta/Ana), early telophase (Early Telo), and late telophase (Late Telo) after 48-hour treatment with siCon or si153 oligos. The phenotype observed in early telophase cells was notably weaker. Data from three experiments plotted as mean  $\pm$  SD; siCon: meta/ana 0 $\pm$ 0%, early telo 0 $\pm$ 0%, late telo 0 $\pm$ 0%; si153: meta/ana 0 $\pm$ 0%, early telo 38 $\pm$ 15%, late telo 80 $\pm$ 13%; \*P < 0.05, \*\*\*P < 0.001.  $\emptyset$  indicates raw values were equal to 0. (C) Montage of cells expressing GFP-lamin B2 and H2B-mCherry progressing through telophase captured by live spinning disk microscopy after treatment with siCon or si153 for 48 hours, with t=0' being the time of complete cleavage furrow ingression observed by time-lapse video. Images were adjusted independently to optimize visibility of the markers. Scale bar 10  $\mu$ m.

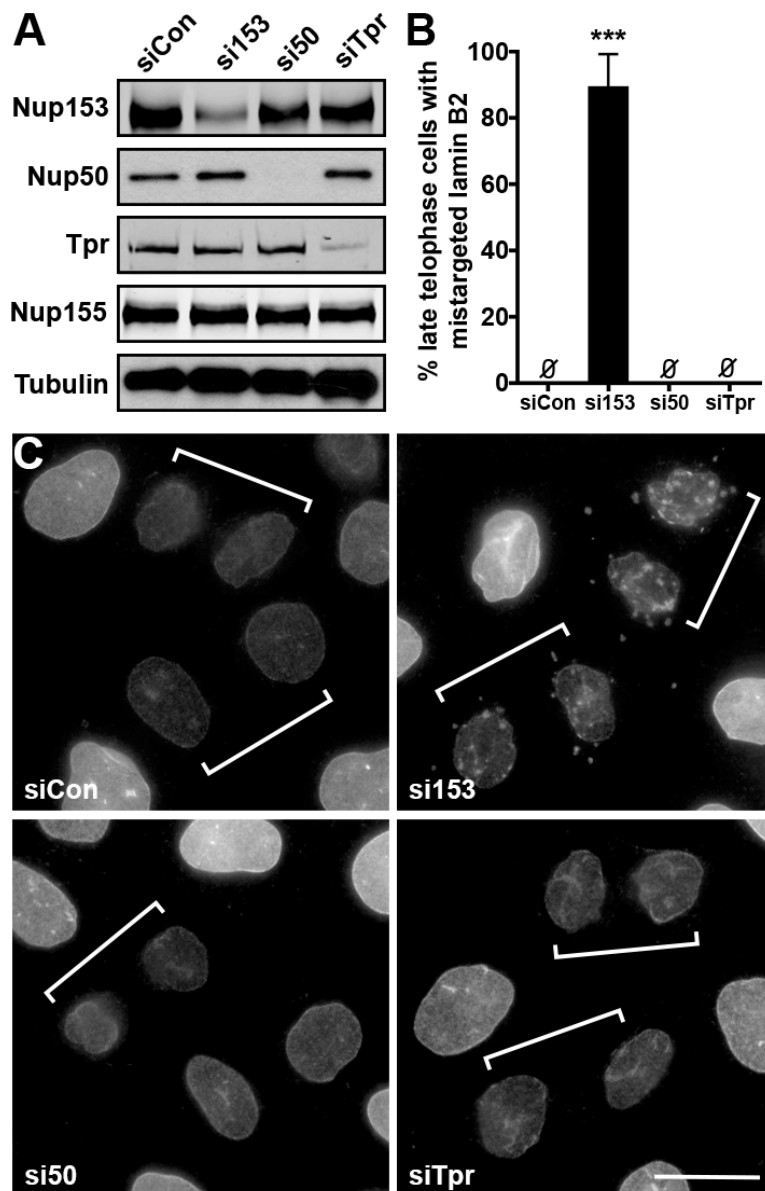

**Figure 2. Lamin B2 mistargeting is not the result of disrupting the pore basket.** (A) Immunoblot of Nup153, Nup50, Tpr, Nup155 and tubulin protein levels after depletion with indicated siRNAs for 48 hours. Nup155 and tubulin were probed as nucleoporin and loading controls, respectively. (B) Quantification of the percent of late telophase cells with mistargeted lamin B2 after treatment with the indicated siRNAs. Data from three experiments plotted as mean  $\pm$  SD; siCon:  $0 \pm 0\%$ ; si153:  $90 \pm 10\%$ ; si50:  $0 \pm 0\%$ ; siTpr:  $0 \pm 0\%$ ; \*\*\* $P < 0.001$ .  $\emptyset$  indicates raw values were equal to 0. (C) Widefield microscopy of lamin B2 for each depletion condition; brackets indicate late telophase cells determined by tubulin co-stain (not shown). Scale bar  $20\mu\text{m}$ .

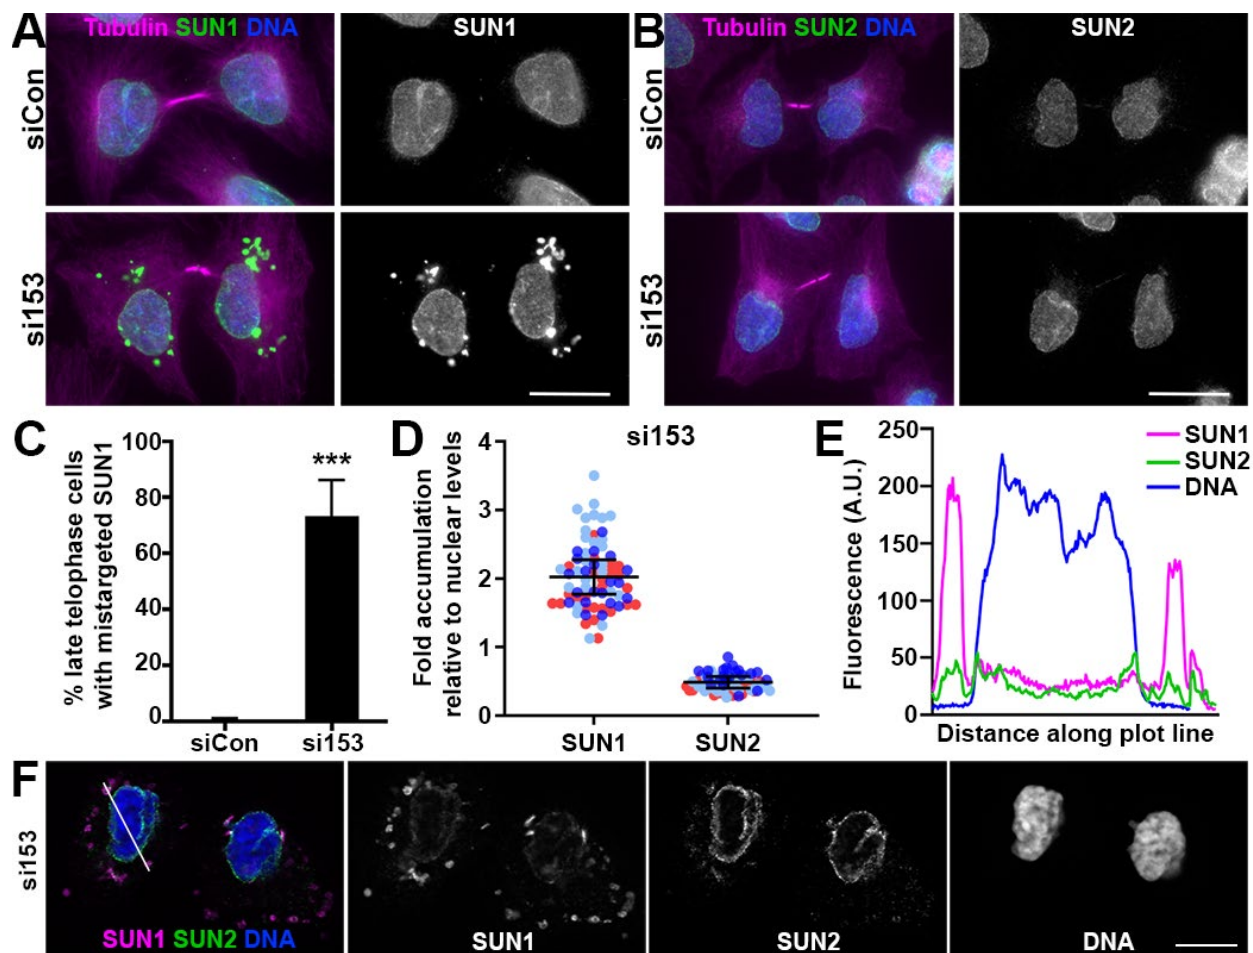

**Figure 3. SUN1, but not SUN2, enriches at ectopic sites in late telophase cells when Nup153 is depleted.** (A) Widefield microscopy of SUN1 and tubulin and SUN2 and tubulin (B) in late telophase cells following treatment with siCon or si153 under thymidine-synchronization conditions. Scale bar 20  $\mu$ m. (C) Quantification of the percent late telophase cells with ectopic SUN1 targeting. Data from three experiments plotted as mean  $\pm$  SD; siCon: 1 $\pm$ 1%; si153: 73 $\pm$ 13%; \*\*\*P < 0.001. (D) Relative levels of SUN1 and SUN2 at ectopic foci compared to nuclear levels under si153 conditions. Data collected from three independent biological replicates are depicted in different colors, N=25, 26, 20; the mean of each experiment was used to calculate the mean  $\pm$  SD, indicated in black; SUN1: 2.0 $\pm$  0.3%; SUN2: 0.5 $\pm$  0.1%. (E) Graphed arbitrary fluorescence of SUN1 and SUN2 along plot line profile indicated on the spinning disk confocal micrographs shown in (F). Scale bar in F, 10  $\mu$ m.

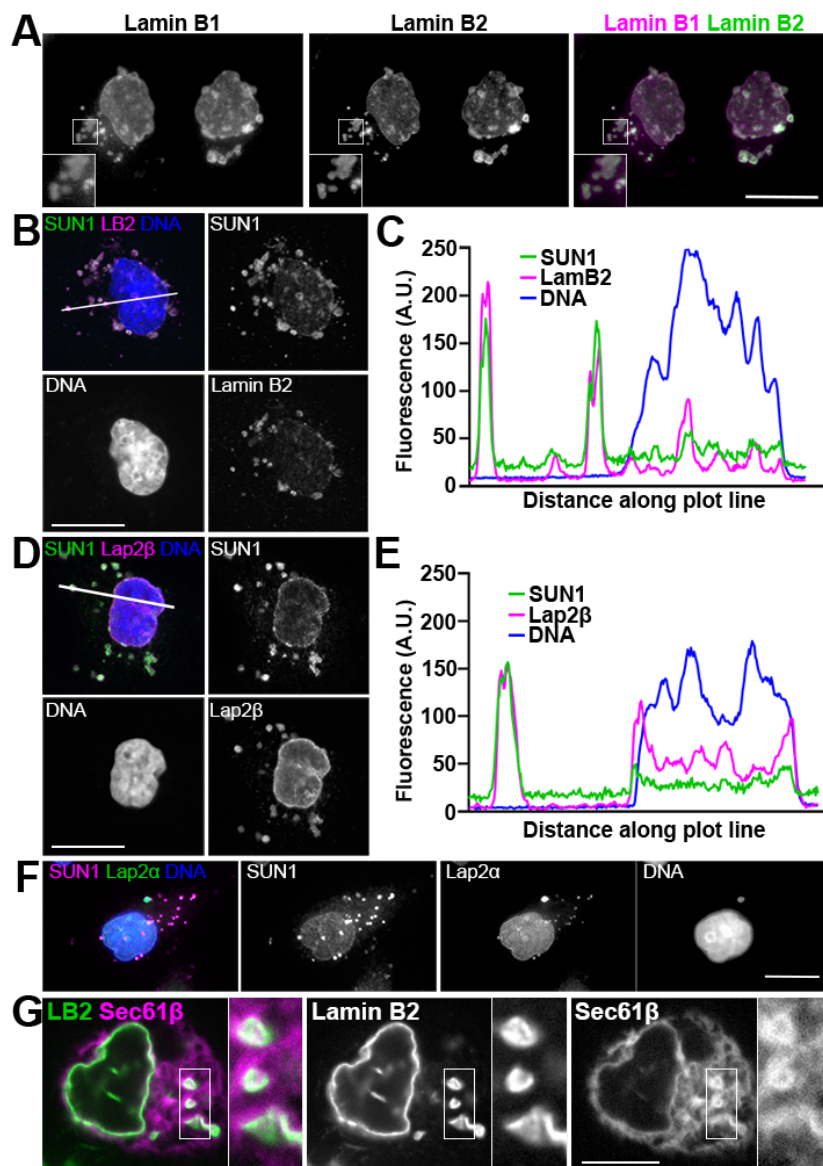

**Figure 4. Mistargeted nuclear envelope proteins co-enrich at ectopic sites that are membranous but distinct from micronuclei.** (A) Representative wide-field images of lamin B1 and B2 in Nup153-depleted cells after thymidine-synchronization. Enlargements are 2x; Scale bar 20  $\mu$ m. (B) Spinning disk confocal micrographs showing lamin B2 and SUN1 after Nup153 depletion. Scale bar 20 $\mu$ m. (C) Arbitrary fluorescence units corresponding to plot line shown in B are graphed. (D) Spinning disk confocal micrographs showing Lap2 $\beta$  and SUN1 after Nup153 depletion. Scale bar 20 $\mu$ m. (E) Arbitrary fluorescence units corresponding to plot line shown in D are graphed. (F) Co-stain of SUN1 and Lap2 $\alpha$  in Nup153-depleted cells by widefield microscopy, distinguish micronucleus from sites of SUN1 accumulation. Scale bar 20 $\mu$ m. (G) Live spinning disk confocal microscopy of BFP-Sec61 $\beta$  and GFP-lamin B2 in si153-treated cell, showing continuity of ER membrane with ectopic site of lamin B2 localization. Enlargements are 2.5x. Scale bar 10 $\mu$ m.

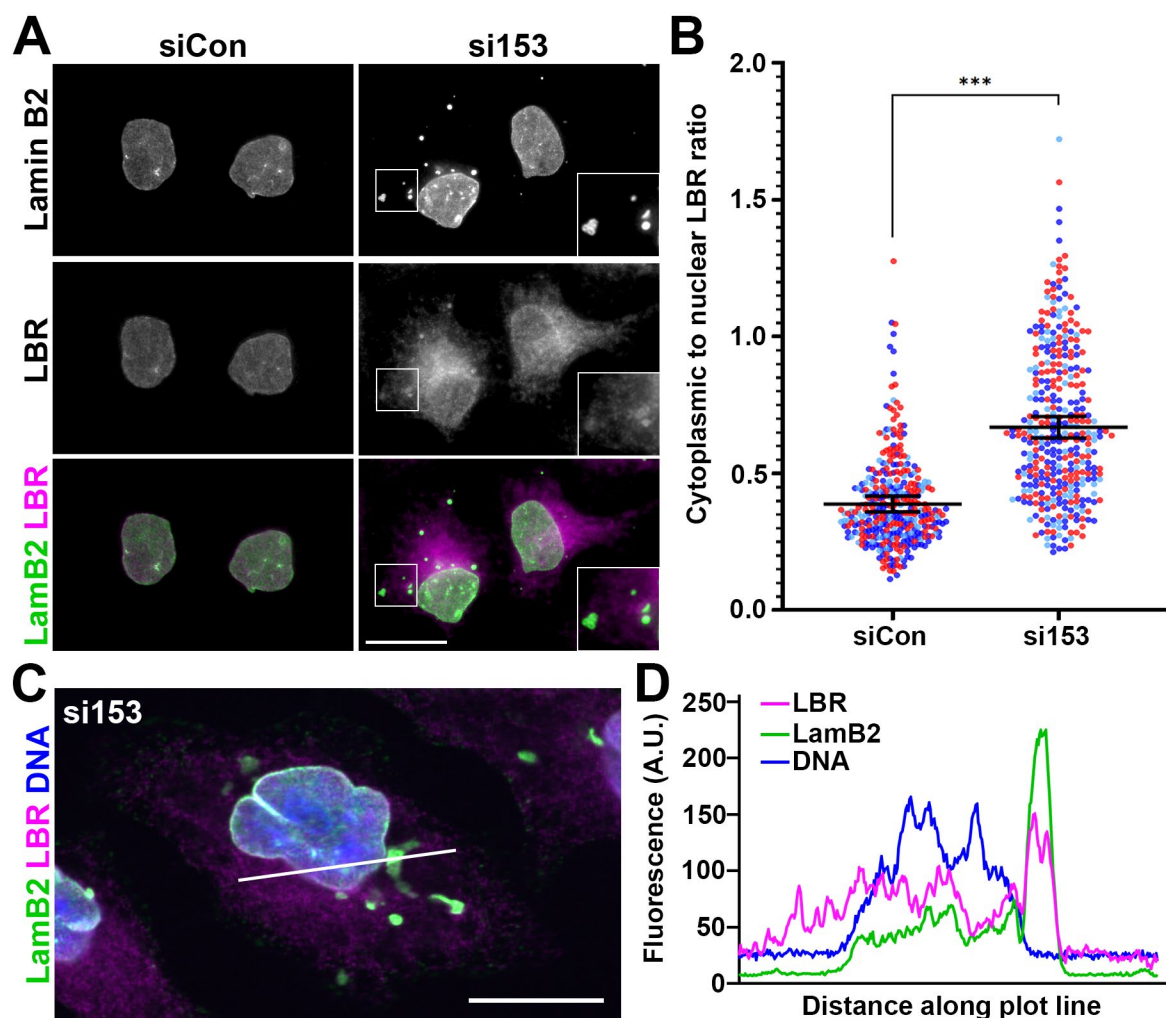

**Figure 5. LBR accumulates ectopically in late-telophase stage cells depleted of Nup153.** (A) Widefield images of LBR and lamin B2 detection in late-telophase cells, determined by tubulin staining (not shown), following treatment with siCon and si153 oligos. Scale bar is 20  $\mu$ m. (B) Quantification of cytoplasmic to nuclear ratio for LBR. Data collected from three biological replicates are depicted in different colors, N = 71, 68, 36 (siCon) and 72, 69, 36 (si153). The mean of each experiment was used to calculate the mean  $\pm$  SD, indicated in black; siCon:  $0.39 \pm 0.03$ ; si153:  $0.67 \pm 0.04$ . (C) Confocal image of LBR and lamin B2 co-detection in siNup153-treated cells. Scale bar, 20  $\mu$ m. (D) Arbitrary fluorescence units corresponding to the plot line shown in C are graphed.



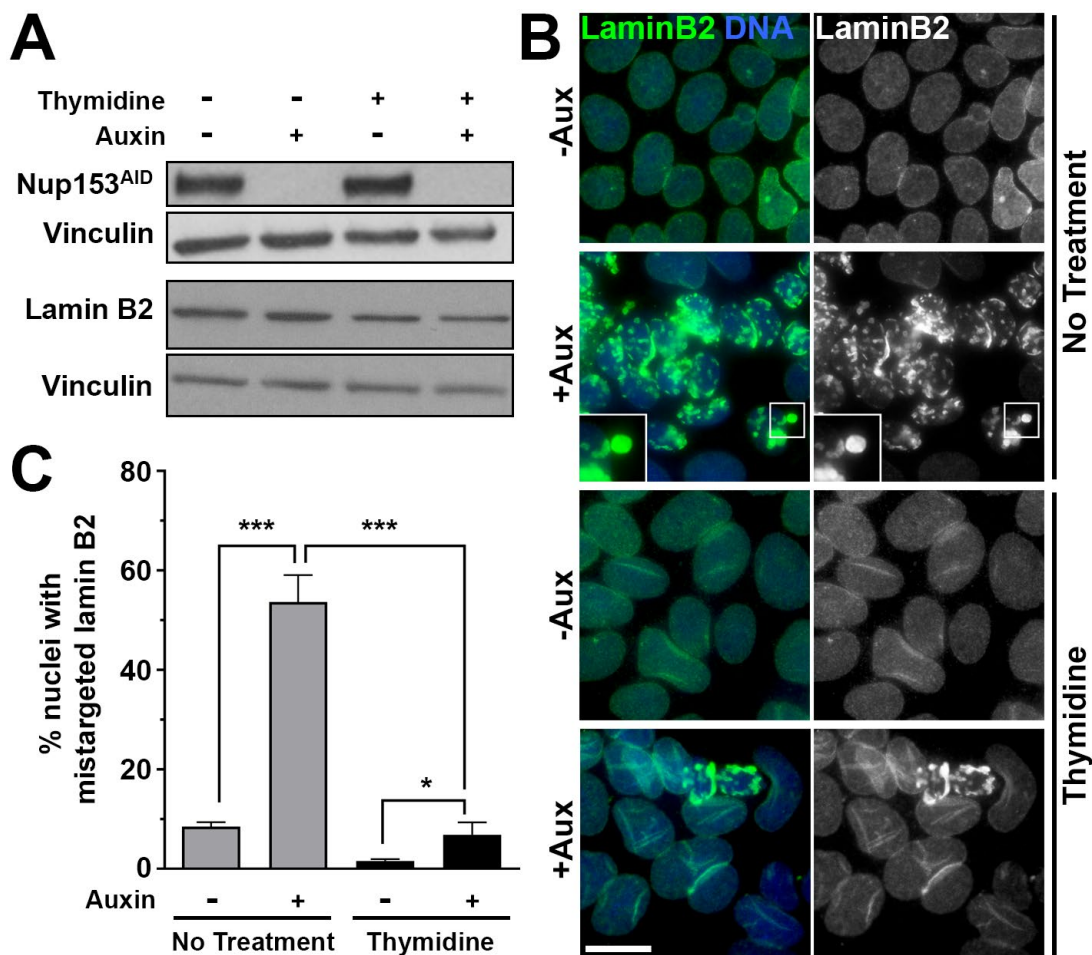

**Figure 6. Nup153 plays a critical role specific to NE formation.** (A) Immunoblot of DLD1-Nup153<sup>AID</sup> cells growing asynchronously or in the presence of thymidine to prevent progression into mitosis. Cells were treated with auxin for 15 hours, as indicated. Following detection of Nup153 and lamin B2, blots were reprobed for vinculin as a loading control. (B) Widefield microscopy of cells treated as in A tracking the appearance of endogenous lamin B2 with DNA counterstained. Images were adjusted independently to best illustrate lamin B2 distribution pattern. Enlargements are 2X. Scale bar is 20  $\mu$ M. (C) Quantification of nuclei with associated lamin B2 foci. Data collected from three biological replicates are graphed using the mean from each experiment to calculate the overall mean  $\pm$  SD; no thymidine, no auxin 8.5 $\pm$ 0.9% (N = 1078, 771, 784); no thymidine, plus auxin 53.6 $\pm$ 5.4% (N = 664, 538, 465); thymidine, no auxin 1.6 $\pm$ 0.4% (N = 486, 404, 389); thymidine, plus auxin 6.8 $\pm$ 2.5% (N = 460, 353, 509). \*P < 0.05, \*\*\*P < 0.001.

## Early Anaphase

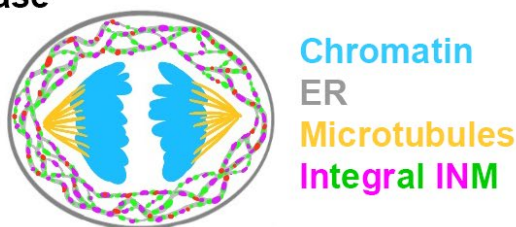

## Late Anaphase

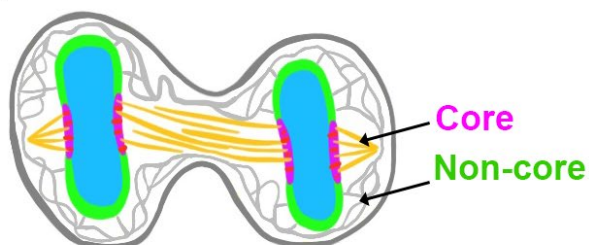

## Telophase

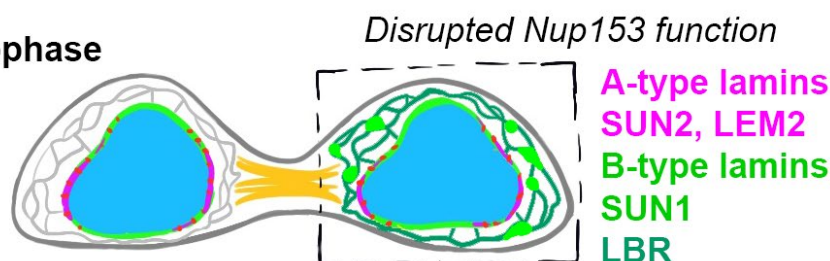

## Interphase

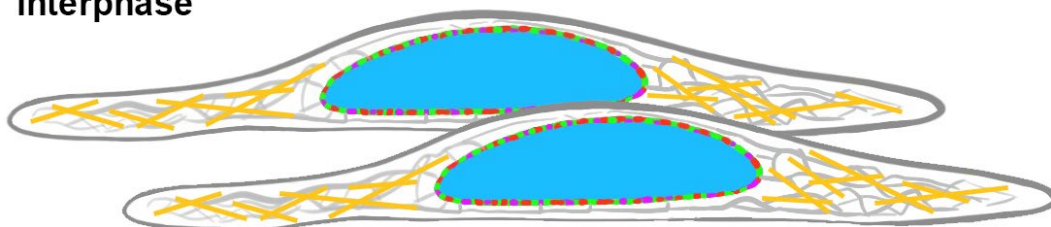

**Figure 7. Summary model of observations.** After the genome segregates in early anaphase, nuclear envelope proteins dispersed throughout the mitotic ER seed the formation of the nascent nuclear envelope at the chromatin surface. By late anaphase, INM proteins form distinct core and non-core domains at NE. As cells exit late anaphase and enter telophase, these transient domains redistribute as midzone microtubules condense into a midbody structure. During the progression from late anaphase to telophase, Nup153 is required for the continued targeting of primarily non-core INM proteins. At interphase, INM protein targeting occurs independently of Nup153.
